# Supplementary material
Source: PubMed Central journal article supplement (PMC4718753)
Supplement: NIHMS745047-supplement-Supp_Table_S1.pdf [file NIHMS745047-supplement-Supp_Table_S1.pdf]

| Primers       | Nucleotide sequences                                          |
|---------------|---------------------------------------------------------------|
| YFPfor        | GTCAACAGATCTCAAGAAGGAGATATACCCATGGTTAGTAAAGGTGAAGAATTGTTTACTG |
| YFPrev        | TGAACCCCACTTCCACCAGAACCTCCCTTGTACAACCTCGTCCATTCTAAAG          |
| M35CMfor      | CTGGTGAAGTGGGGGTTTCATCTGCTTATAACGGACAAGGTCG                   |
| M35CMrev      | AGATGCGGCCGC <u>ACGCGTT</u> TACGGCTTCTGAATCAACAACCTCAG        |
| T7-Nt-rbcLrev | GAAATTAATACGACTCACTATAGGGTTACTTATCCAAAACGTCCACTGCTG           |
| Nt-rbcLfor    | ATCATATCACTCTGGTACCGTAG                                       |
| T7-aadArev    | GAAATTAATACGACTCACTATAGGGTTTGCCAACTACCTTAGTGATCTC             |
| aadAfor       | ATGGCTCGTGAAGCGGTTATCG                                        |
| T7-Se-rbcLrev | GAAATTAATACGACTCACTATAGGGAAGCTTATCCATTGTCTCAAATTCAAAC         |
| Se-rbcL5      | GTATGCCAATCATAATGCATGATTTTC                                   |
| T7-Se-rbcSrev | GAAATTAATACGACTCACTATAGGGATATCTTCCAGGTCGATGCACAATG            |
| Se-rbcS5      | GGATCCATGAGTATGAAAACCTTGCCAAAAGAACG                           |
| T7-Se-rbcXrev | GAAATTAATACGACTCACTATAGGGTCAATCCGCATGGGAGGCATTAG              |
| Se-rbcX5      | CGCATCAGTCGCGATACAG                                           |
| T7-Se-Mrev    | GAAATTAATACGACTCACTATAGGGCGGCTTTTGAATCAACAGTTCAGC             |
| Se-M5         | TCCTGCGCACCGATTCAAAGT                                         |
| T7-Se-MCMrev  | GAAATTAATACGACTCACTATAGGGCGGCTTCTGAATCAACAACCTC               |
| Se-MCM5       | ACCTGATGGTTCGGTTCCTGAATC                                      |
