# Supplementary material
Source: PubMed Central journal article supplement (PMC4718753)

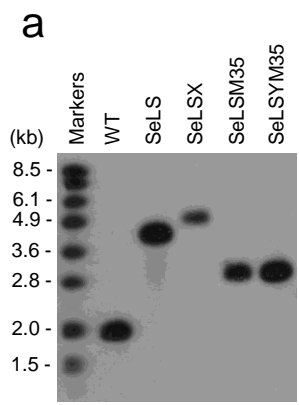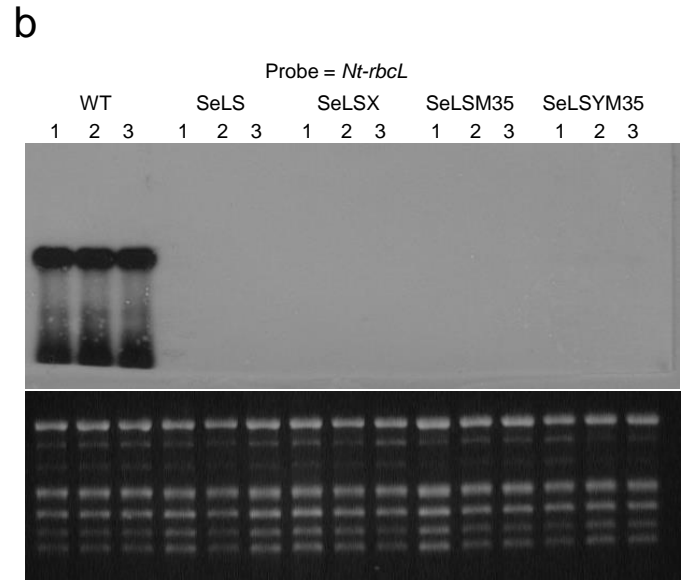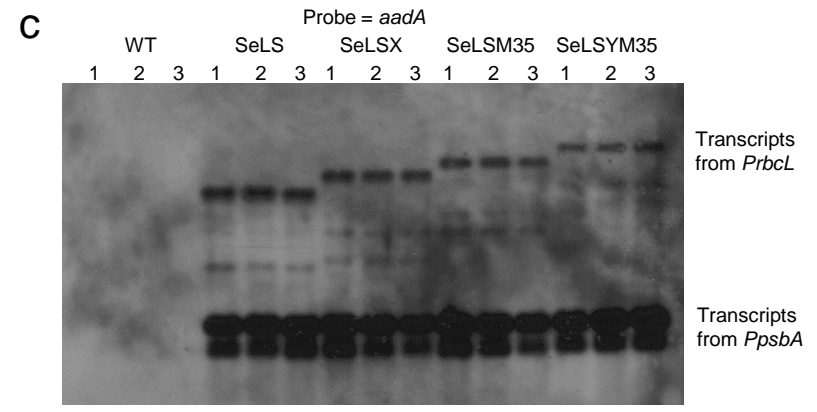

Supplement: NIHMS745047-supplement-Supp_Fig_S1.pdf [file NIHMS745047-supplement-Supp_Fig_S1.pdf]

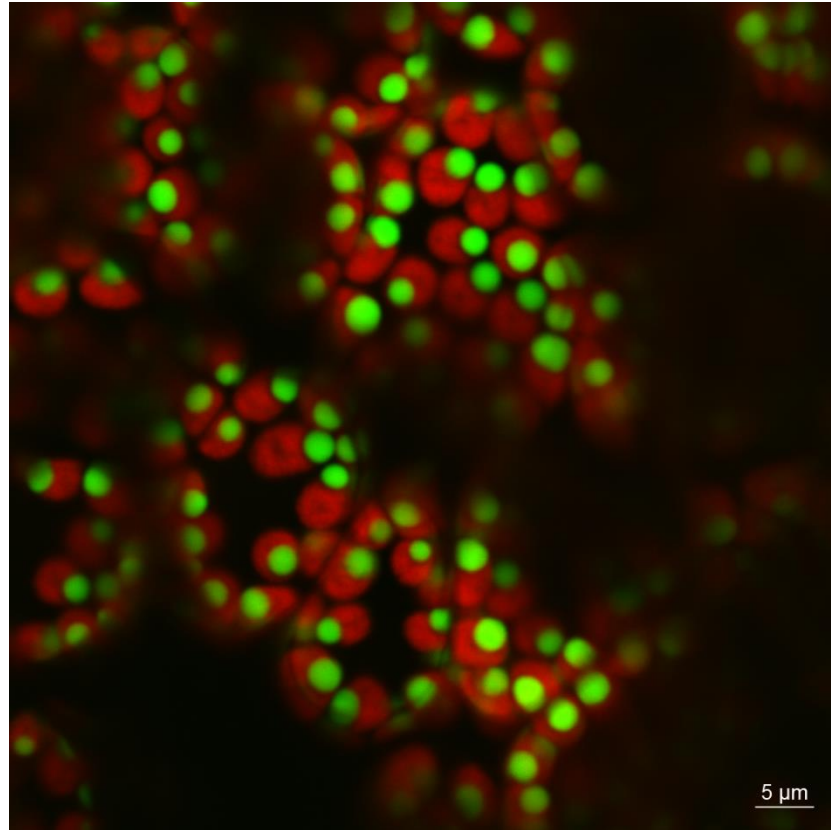

Supplement: NIHMS745047-supplement-Supp_Fig_S2.pdf [file NIHMS745047-supplement-Supp_Fig_S2.pdf]

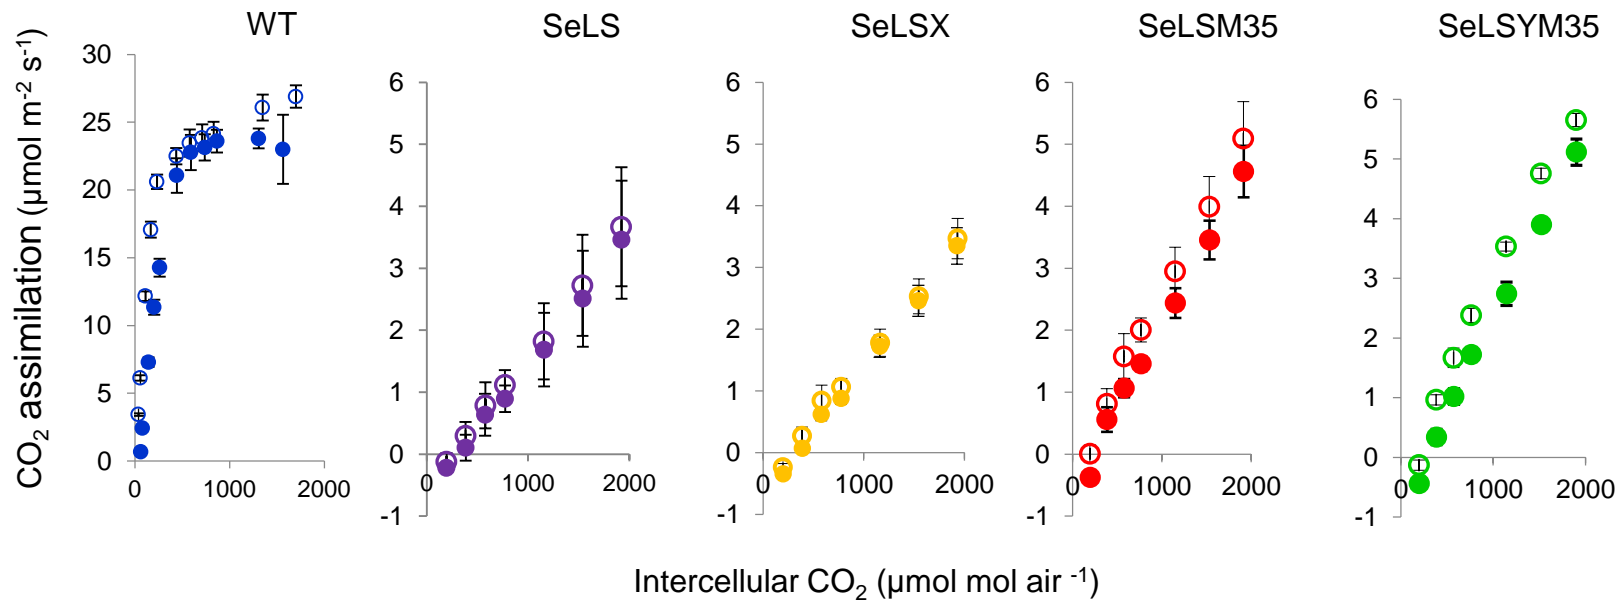

| Oxygen (%) | Mean CO <sub>2</sub> compensation point (μmol. mol air <sup>-1</sup> ) |      |       |         |          |
|------------|------------------------------------------------------------------------|------|-------|---------|----------|
|            | wt                                                                     | SeLS | SeLSX | SeLSM35 | SeLSYM35 |
| 2          | 12                                                                     | 250  | 285   | 193     | 218      |
| 21         | 55                                                                     | 324  | 357   | 274     | 304      |

Supplement: NIHMS745047-supplement-Supp_Fig_S3.pdf [file NIHMS745047-supplement-Supp_Fig_S3.pdf]

**a**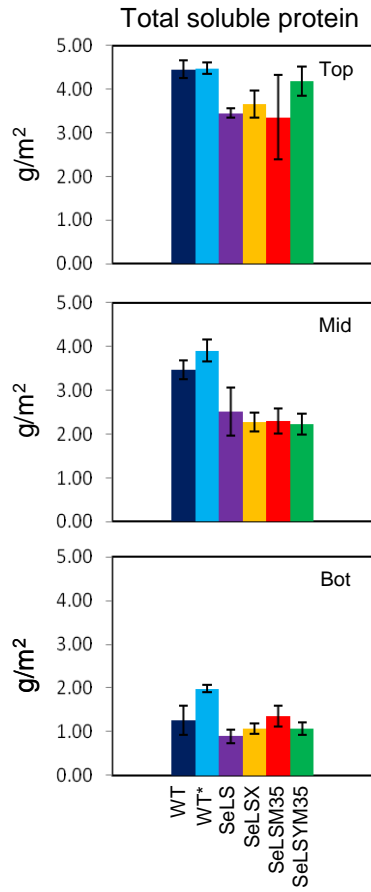**b**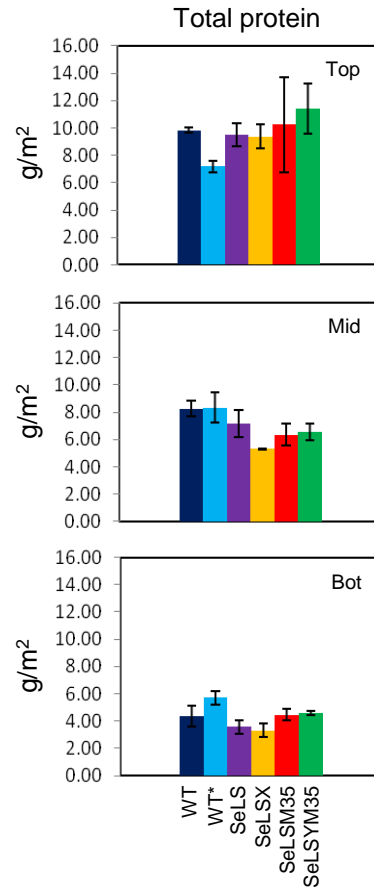**c**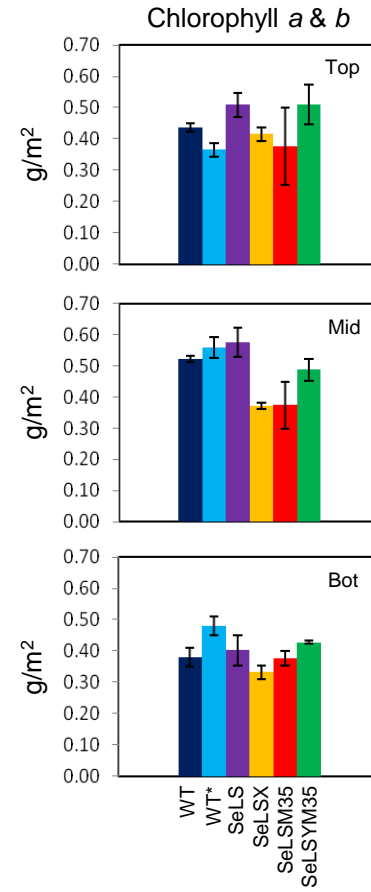

Supplement: NIHMS745047-supplement-Supp_Fig_S4.pdf [file NIHMS745047-supplement-Supp_Fig_S4.pdf]

**a**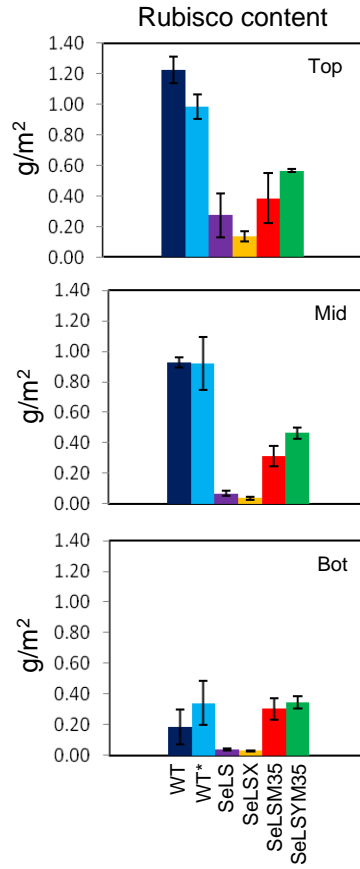**b**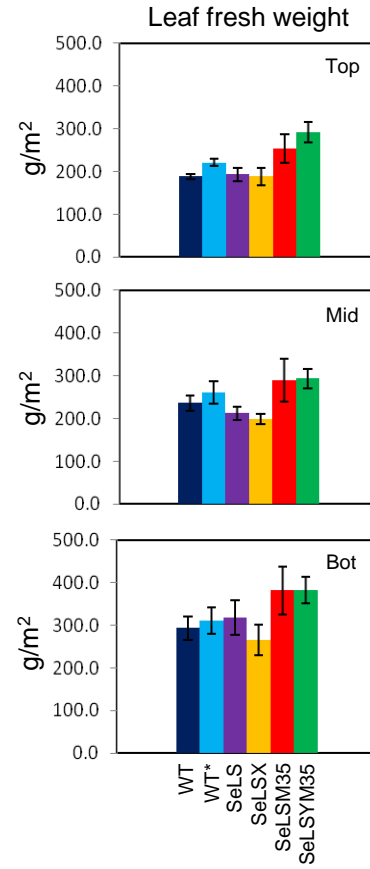**c**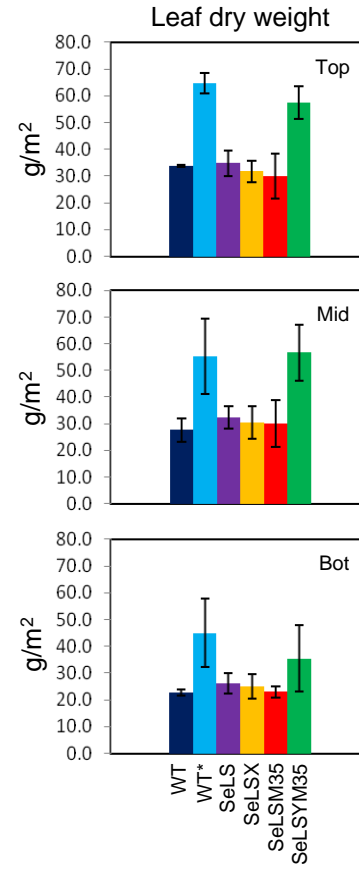

Supplement: NIHMS745047-supplement-Supp_Fig_S5.pdf [file NIHMS745047-supplement-Supp_Fig_S5.pdf]
